# Supplementary material
Source: Springer Nature journal article supplement (https://www.springermedizin.de/resource/supplementary/12889_2013_6796_MOESM4_ESM.pdf/9498878)

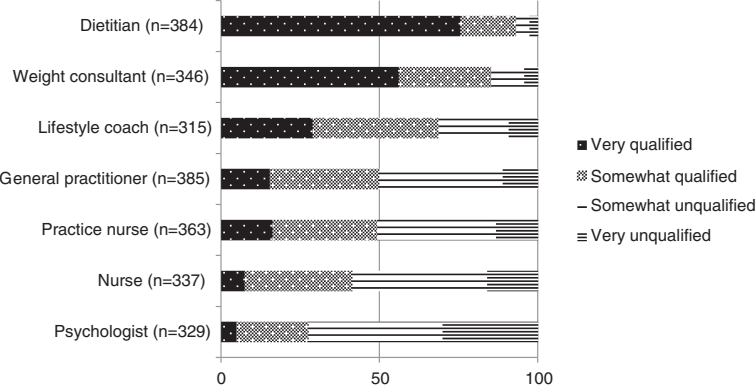

Supplement: MOESM4 [file 9498878]
